# Supplementary material for: Green synthesis of ultra-bright Cs3MnBr5 films by a CVD method
Source: Royal Society of Chemistry journal article supplement (doi:10.1039/d5cc00135h), 2025-01-01
Supplement: d5cc00135h1.pdf [file d5cc00135h1.pdf]

## Supplementary Information

### Green synthesis of ultra-bright Cs<sub>3</sub>MnBr<sub>5</sub> films by CVD method

Shu Li,<sup>†a</sup> Chuanhe Ma,<sup>†a</sup> Fushuai Li,<sup>a</sup> Jinchun Jiang<sup>b</sup> and Hailong Wang<sup>\*a</sup>

a. School of Physics and Physical Engineering, Qufu Normal University, Qufu 273165, China. Email:hlwang@qfnu.edu.cn

b. Key Laboratory of Polar Materials and Devices (MOE), Department of Electronic science, East China Normal University, Shanghai 200241, China.

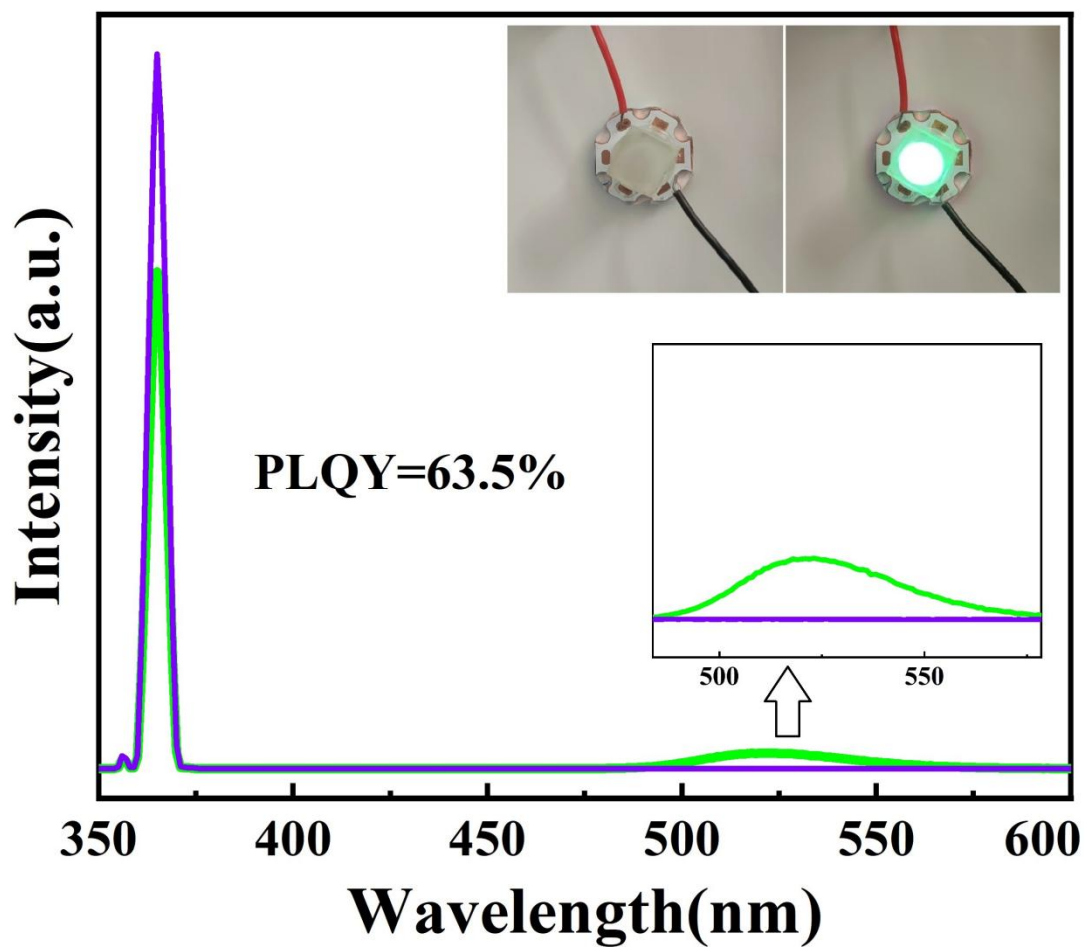

**Fig.S1 PLQY of  $\text{Cs}_3\text{MnBr}_5$  thin film, Inset shows the film being excited by a 365nm LED with and without turning on, respectively**

As shown in Fig.S1, the PLQY of  $\text{Cs}_3\text{MnBr}_5$  film is 63.5%, indicating that this material is ideal for LEDs. We used a 365nm LED chip to pump  $\text{Cs}_3\text{MnBr}_5$  thin films to demonstrate this application optically. The  $\text{Cs}_3\text{MnBr}_5$  thin film emits bright green light, proving that it is an ideal candidate for preparing optical devices.

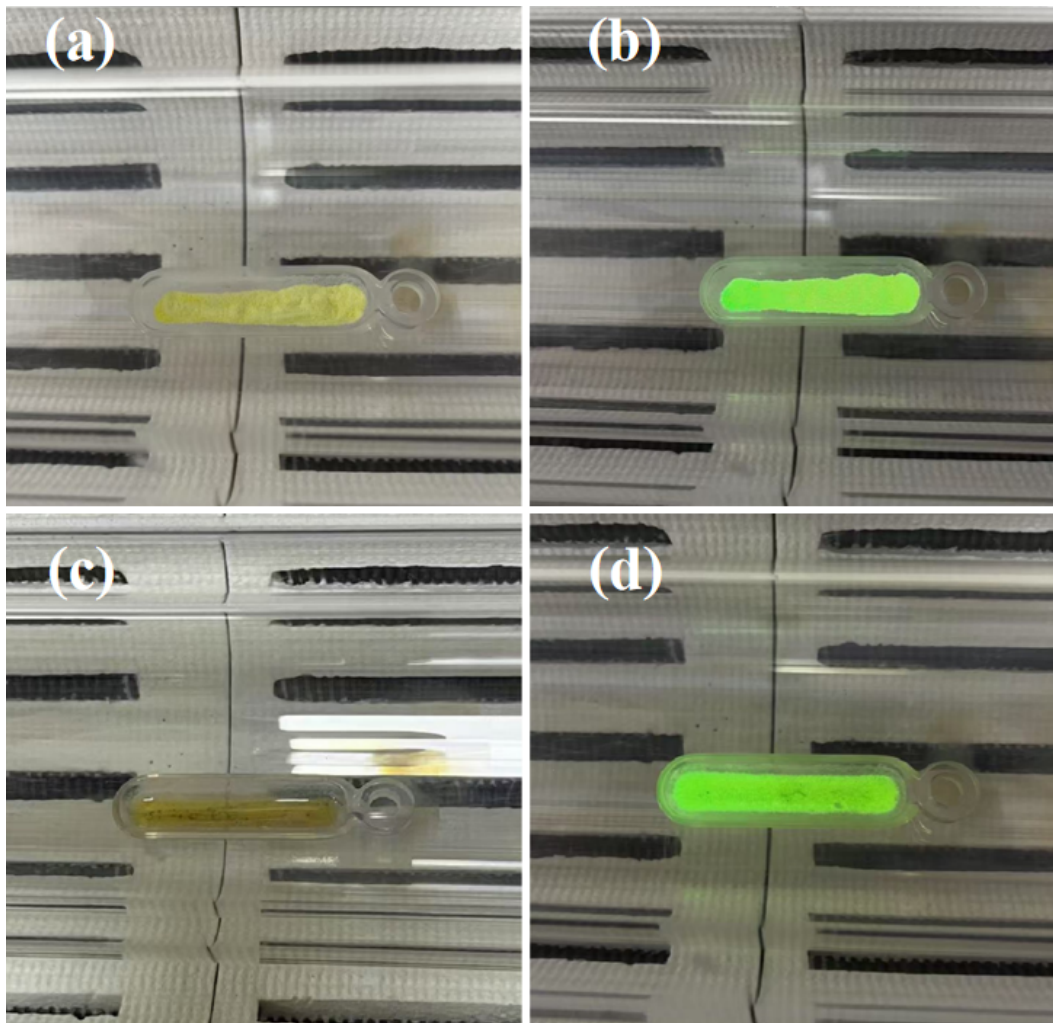

**Fig.S2 Physical photos of Cs<sub>3</sub>MnBr<sub>5</sub> material at different temperatures, powder at RT before annealing: (a) no excitation light, (b) 365nm excitation light; (c) Melting into liquid at 550 °C; (d) Natural condensation into powder at RT, re-emitting green light under 365nm illumination**

To verify that the endothermic extremum at 490 °C in TG and DSC curves is the melting point, we conducted a comparative annealing experiment on the morphology of Cs<sub>3</sub>MnBr<sub>5</sub> material. As shown in Fig.S2(a), the Cs<sub>3</sub>MnBr<sub>5</sub> material in the quartz boat initially appears as a yellow powder at room temperature. Under 365nm near-infrared light irradiation, Cs<sub>3</sub>MnBr<sub>5</sub> powder emits green fluorescence. Our CVD annealing furnace adopts a two-layer quartz tube structure to prevent equipment contamination caused by Cs<sub>3</sub>MnBr<sub>5</sub> sublimation. To verify the melting point quickly, considering the temperature gradient field as the thermocouple outside the quartz tube, we directly applied an annealing temperature of 550°C to Cs<sub>3</sub>MnBr<sub>5</sub> powder.

As shown in Fig.S2(c), Cs<sub>3</sub>MnBr<sub>5</sub> powder completely melted into a yellow transparent liquid at 550 °C. Therefore, we can conclude that the endothermic extremum at 490 °C in the TG and DSC curves is indeed the melting point. Herein, it is worth pointing out that this is the first disclosure regarding the melting point of Cs<sub>3</sub>MnBr<sub>5</sub> powder being around 490 °C. After natural cooling, it is impressive that Cs<sub>3</sub>MnBr<sub>5</sub> material can still emit green light, as shown in Fig.S2(d). It indicates that the Cs<sub>3</sub>MnBr<sub>5</sub> material we synthesized by CVD method has excellent thermal stability.

**Table S1 Comparative analysis of all inorganic lead-free perovskite PLQY and stability****Trans-Temp. denote transition temperature, RT denote room temperature**

| Materials                                             | Physical form | Emission peak | PLQY            | Stability                             | Ref       |
|-------------------------------------------------------|---------------|---------------|-----------------|---------------------------------------|-----------|
| CsCu <sub>2</sub> I <sub>3</sub>                      | Film          | 548nm         | 20.6%           | PLQY = 95% Init. at 100 °C            | 1         |
| Cs <sub>3</sub> Cu <sub>2</sub> I <sub>5</sub>        | Film          | 458nm         | 87%             | In 123 phase above 120 °C             | 2-3       |
| CsSnBr <sub>3</sub>                                   | Film          | 680nm         | 1.47% ( PeLed ) | Oxidation into Sn <sup>4+</sup> at RT | 4         |
| Cs <sub>3</sub> Sb <sub>2</sub> Br <sub>9</sub>       | QDs           | 410nm         | 46%             | 35 days (70%) at RT                   | 5         |
| Cs <sub>3</sub> Bi <sub>2</sub> Br <sub>9</sub>       | QDs           | 468nm         | 22%             | Trans-Temp. is 550 °C                 | 6-7       |
| Cs <sub>2</sub> NaInCl <sub>6</sub> :Yb <sup>3+</sup> | Crystals      | 996nm         | 39.4%           | Trans-Temp. is 600 °C                 | 8-9       |
| Cs <sub>2</sub> EuCl <sub>6</sub>                     | Nanocrystals  | 435nm         | 5.7 ± 0.3%      | —                                     | 10        |
| Cs <sub>3</sub> MnBr <sub>5</sub>                     | Film          | 520nm         | 63.5%           | Trans-Temp. is 723°C                  | This Work |

We carefully compared and analyzed Cs<sub>3</sub>MnBr<sub>5</sub> material with other existing lead-free alternatives, as shown in Table S1, including CsCu<sub>2</sub>I<sub>3</sub>, Cs<sub>3</sub>Cu<sub>2</sub>I<sub>5</sub>, CsSnBr<sub>3</sub>, Cs<sub>3</sub>Sb<sub>2</sub>Br<sub>9</sub>, Cs<sub>3</sub>Bi<sub>2</sub>Br<sub>9</sub>, Cs<sub>2</sub>NaInCl<sub>6</sub>, and Cs<sub>2</sub>EuCl<sub>6</sub>. Regarding fluorescence efficiency, Cs<sub>3</sub>Cu<sub>2</sub>I<sub>5</sub> and Cs<sub>3</sub>MnBr<sub>5</sub> materials exhibit superior PLQY values. In prior art, the research perspective on lead-free perovskites' temperature stability is inconsistent.

However, together with Fig.7(a) and (b), significant mass loss begins around 723 °C, and the endothermic peak is broad, reaching a minimum weight at 828 °C with a 90% weight loss, indicating sublimation. No significant weight loss occurs below 600°C, indicating excellent thermal stability for our Cs<sub>3</sub>MnBr<sub>5</sub> thin films.

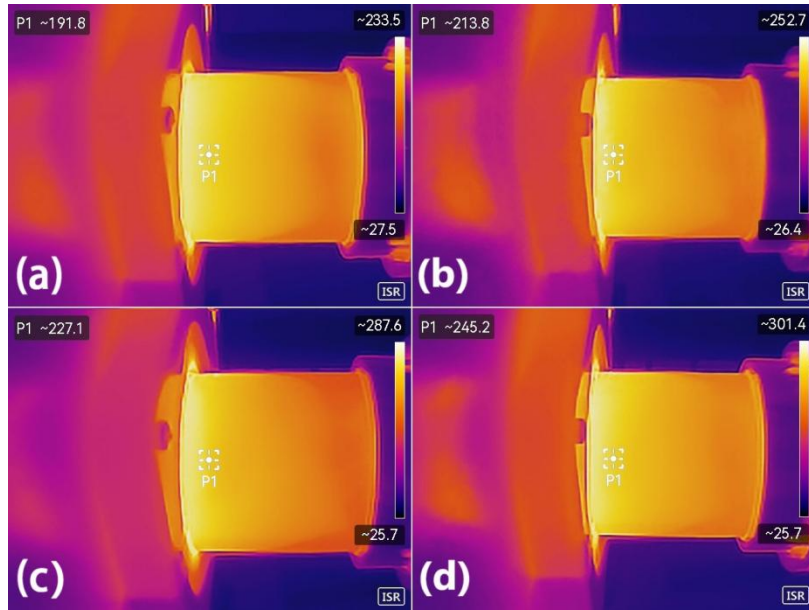

**Fig.S3 Temperature Field of CVD Tube Furnace Substrate Side at Different Annealing Temperatures : (a) 700°C, (b) 800°C, (c) 900°C, (d) 1000°C**

Temperature critically affects grain size and surface morphology in high-quality perovskite films<sup>[11]</sup>. Using the H3Pro thermal imager, we measured temperature distribution across the substrate in a tube annealing furnace.

As the annealing temperature at the quartz boat side rose from 700-1000 °C, the target detects temperatures increase in sequence at the P1 area of the substrate side: 191.8 °C, 213.8 °C, 227.1 °C, and 245.2 °C. The rise in the highest values and P1 temperatures is mainly due to quartz tube heat conduction and raw material vapor. Determining substrate temperature supports process optimization and high-quality Cs<sub>3</sub>MnBr<sub>5</sub> film preparation.

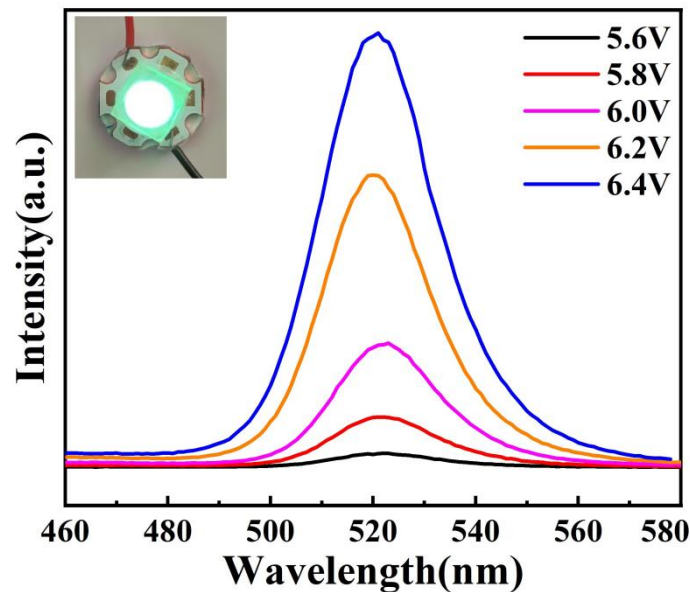

**Fig.S4 The PL intensity of Cs<sub>3</sub>MnBr<sub>5</sub> LED under different driving voltages**

Cs<sub>3</sub>MnBr<sub>5</sub>, with broadband transmission, high PLQY, and stability, suits solid-state lighting. Figure S4 shows practical PL devices using Cs<sub>3</sub>MnBr<sub>5</sub> thin film on a 365nm UV LED chip. PL intensity increases with driving voltage (5.6-6.4V), allowing voltage analysis via light intensity. Fitting its function curve can further analyze the voltage amplitude and stability from the perspective of light intensity.

## References

- 1 Z.Ma, Z. Shi, C. Qin, M. Cui, D. Yang, X. Wang, L. Wang, X. Ji, X. Chen, J. Sun, D. Wu, Y. Zhang, X. J. Li, L. Zhang and C. Shan (2020). ACS Nano 14(4): 4475-4486.
- 2 T.Chen, X. Li, Y. Wang, F. Lin, R. Liu, W. Zhang, J. Yang, R. Wang, X. Wen, B. Meng, X. Xu and C. Wang (2023). Journal of Energy Chemistry 79: 382-389.
- 3 W.Cui, J. Zhao, L. Wang, P. Lv, X. Li, Z. Yin, C. Yang and A. Tang (2022). The Journal of Physical Chemistry Letters 13(22): 4856-4863.
- 4 J.-M.Heo, H. Cho, S.-C. Lee, M.-H. Park, J. S. Kim, H. Kim, J. Park, Y.-H. Kim, H. J. Yun, E. Yoon, D.-H. Kim, S. Ahn, S.-J. Kwon, C.-Y. Park and T.-W. Lee (2022). ACS Energy Letters 7(8): 2807-2815.
- 5 J.Zhang, Y. Yang, H. Deng, U. Farooq, X. Yang, J. Khan, J. Tang and H. Song (2017). ACS Nano 11(9): 9294-9302.
- 6 Y.Lou, M. Fang, J. Chen and Y. Zhao (2018). Chemical Communications 54(30): 3779-3782.
- 7 Y.Zhang, Y. Liu, Z. Xu, H. Ye, Z. Yang, J. You, M. Liu, Y. He, M. G. Kanatzidis and S. Liu (2020). Nature Communications 11(1):2304.
- 8 S.Han, D. Tu, Z. Xie, Y. Zhang, J. Li, Y. Pei, J. Xu, Z. Gong and X. Chen (2022). Advanced Science 9(32):2203735.
- 9 R.Zeng, L. Zhang, Y. Xue, B. Ke, Z. Zhao, D. Huang, Q. Wei, W. Zhou and B. Zou (2020). The Journal of Physical Chemistry Letters 11(6): 2053-2061.
- 10 J.Huang, T. Lei, M. Siron, Y. Zhang, S. Yu, F. Seeler, A. Dehestani, L. N. Quan, K. Schierle-Arndt and P. Yang (2020). Nano Letters 20(5): 3734-3739.
- 11 S.Li, Y. Xiao, R. Su, W. Xu, D. Luo, P. Huang, L. Dai, P. Chen, P. Caprioglio, K. A. Elmostekawy, M. Dubajic, C. Chosy, J. Hu, I. Habib, A. Dasgupta, D. Guo, Y. Boeije, S. J. Zelewski, Z. Lu, T. Huang, Q. Li, J. Wang, H. Yan, H.-H. Chen, C. Li, B. A. I. Lewis, D. Wang, J. Wu, L. Zhao, B. Han, J. Wang, L. M. Herz, J. R. Durrant, K. S. Novoselov, Z.-H. Lu, Q. Gong, S. D. Stranks, H. J. Snaith and R. Zhu (2024). Nature 635(8040): 874-881.
